# Supplementary material
Source: HighWire-hosted journal article supplement (https://erj.ersjournals.com/content/55/1/1902102)
Supplement: inline-supplementary-material-1 [file inline-supplementary-material-1.pdf]

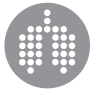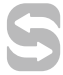

SHAREABLE PDF

AGORA

CORRESPONDENCE

ERJ European Respiratory Journal Eur Respir J 0903-1936/1399-3003 European Respiratory Society 10.1183/13993003.02102-2019 ERJ-02102-2019 AGORA CORRESPONDENCE

Is it time to give up on “self-management” of COPD exacerbations?  
CORRESPONDENCE CORRESPONDENCE Is it time to give up on “self-management” of COPD exacerbations?

Ramakrishnan Sanjay, Bafadhel Mona,

Nuffield Dept of Medicine – Experimental Medicine, University of Oxford, Oxford, UK.

**Correspondence:** Sanjay Ramakrishnan, NDM – Experimental Medicine, University of Oxford, John Radcliffe Hospital, (Room 5800, Level 5), Oxford, OX3 9DU, UK. E-mail: sanjay.ramakrishnan@ndm.ox.ac.uk 2020 2019 55028102019311020192020

*To the Editor:*

We read with interest the report of the results of the COPE-III trial by LENFERINK *et al.* [1]. This large randomised trial continues on from the authors’ earlier COPE-II study [2], with personalised exacerbation action plans based on associated comorbidities. The action plans were detailed, and designed to determine symptom changes and the signs of an ensuing exacerbation. The study was negative for its primary endpoint (COPD exacerbation days) and no improvement in quality of life was found using the self-management intervention. The authors show no difference in the number of oral prednisolone courses in both arms, although per exacerbation event, it is clear that self-management dictates a significant increase of prednisolone prescription per event (95% (208/216) *versus* 71% (163/230)) and thus would have also been the initial treatment for heart failure, anxiety, depression and ischaemic heart disease events. Interestingly, the authors found that patients that benefited in the self-management arm were those that had one or more COPD exacerbations in the 12-month study period. We now know that eosinophilic inflammation is associated with increased risk of exacerbations [3] and that patients that have the best response to systemic corticosteroids have eosinophilic exacerbations [4]. We ask with interest if the authors phenotyped inflammation of the COPD patients prior to randomisation?
